# Supplementary material for: Icaritin inhibits the expression of alpha-fetoprotein in hepatitis B virus-infected hepatoma cell lines through post-transcriptional regulation
Source: PubMed Central journal article supplement (PMC5347802; doi:10.18632/oncotarget.13194), 2016-11-08
Supplement: oncotarget-07-83755-s001.pdf [file oncotarget-07-83755-s001.pdf]

## Icaritin inhibits the expression of alpha-fetoprotein in hepatitis B virus-infected hepatoma cell lines through post-transcriptional regulation

### SUPPLEMENTARY FIGURES AND TABLE

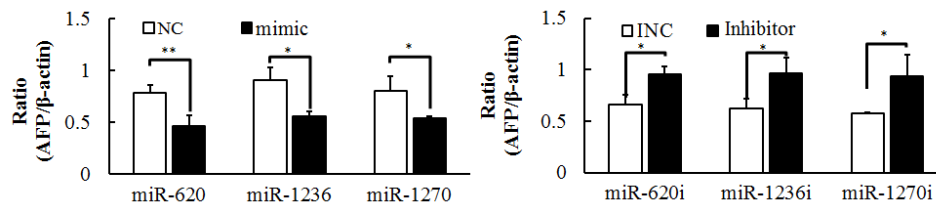

**Supplementary Figure S1: Gray scale analysis of the expression of AFP in miR-620, miR-1236, miR-1270 transfected cells.** These experiments were repeated at least three times. Data represents mean  $\pm$  SD of three samples. \* $P < 0.05$  and \*\* $P < 0.01$  as compared with controls.

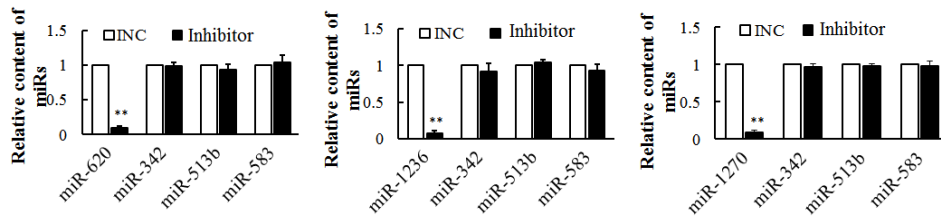

**Supplementary Figure S2: Determination of the specificity of the inhibitors of miR-620, miR-1236 and miR-1270.**

These experiments were repeated at least three times. Data represents mean  $\pm$  SD of three samples. \* $P < 0.05$  and \*\* $P < 0.01$  as compared with controls.

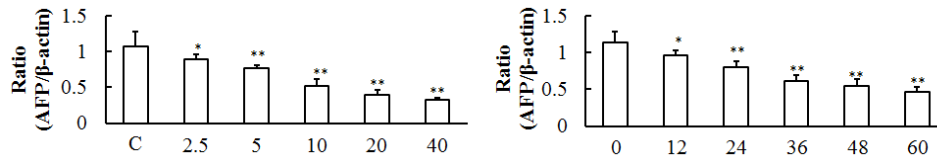

**Supplementary Figure S3: Gray scale analysis of effects of icaritin on the expression of AFP.** These experiments were repeated at least three times. Data represents mean ± SD of three samples. \* $P < 0.05$  and \*\* $P < 0.01$  as compared with controls.

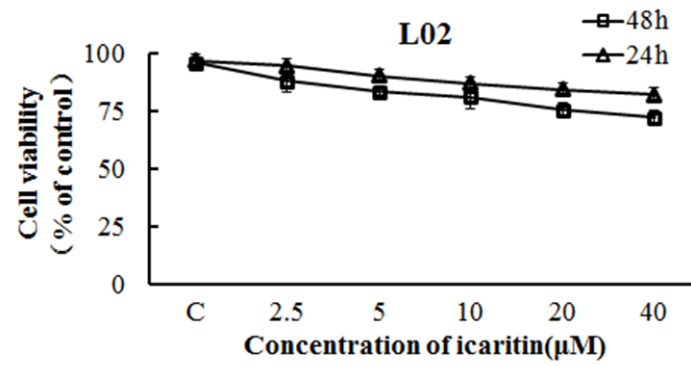

**Supplementary Figure S4: Effects of icaritin on the growth of L02 normal human hepatocytes.** These experiments were repeated at least three times. Data represents mean  $\pm$  SD of three samples. \* $P < 0.05$  and \*\* $P < 0.01$  as compared with controls.

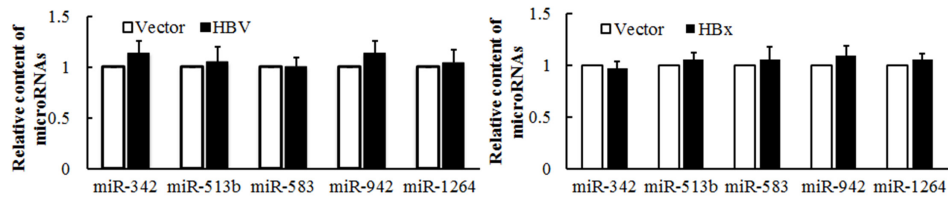

**Supplementary Figure S5: Effects of HBV and HBx on the expression of miR-342, miR-513b, miR-583, miR-942 and miR-1264.** These experiments were repeated at least three times. Data represents mean  $\pm$  SD of three samples. \* $P < 0.05$  and \*\* $P < 0.01$  as compared with controls.

Supplementary Table S1: Sequences of oligonucleotides used for RT-qPCR and plasmid constructs assays

|                                       |           | Oligonucleotides sequences             | Product size(bp) |
|---------------------------------------|-----------|----------------------------------------|------------------|
| <b>Primers for RT-qPCR</b>            |           |                                        |                  |
| AFP                                   | Sense     | 5'- CCAACAGGAGGCCATGCTT -3'            | 61               |
|                                       | Antisense | 5'- GAATGCAGGAGGGACATATGTTT -3'        |                  |
| β-actin                               | Sense     | 5'- CCAACCGCGAGAAGATGA -3'             | 97               |
|                                       | Antisense | 5'- CCAGAGGCGTACAGGGATAG -3'           |                  |
| U6                                    | Sense     | 5'- GCTTCGGCAGCACATATACTAAAAT -3'      |                  |
| <b>Primers for plasmid constructs</b> |           |                                        |                  |
| HBx                                   | Sense     | 5'- CCCAAGCTTATGGCTGCTCGGGTGTGCT -3'   |                  |
|                                       | Antisense | 5'- GCTCTAGAGCCAGCTTGGAGGCTTGAACAG -3' |                  |
| AFP-3'UTR                             | Sense     | 5'- CGGCTAGCATTACTTCAGGGGAAG -3'       |                  |
|                                       | Antisense | 5'- CGGAATTCGAAAAGGAAACATTTGG -3'      |                  |
| AFP-3'UTR-MU                          | Sense     | 5'- GGCTAGCATTACTTCAGTTTCGTCGAAGAC -3' |                  |
|                                       | Antisense | 5'- GGAATTCGAAACATTCCCGAGCGTTTTAT -3'  |                  |
| AFP-3'UTR-MU1                         | Sense     | 5'- GGCTAGCATTACTTCAGTTTCGTCGAAGAC -3' |                  |
|                                       | Antisense | 5'- CGGAATTCGAAAAGGAAACATTTGG -3'      |                  |
| AFP-3'UTR-MU2                         | Sense     | 5'- CGGAATTCGAAAAGGAAACATTTGG -3'      |                  |
|                                       | Antisense | 5'- GGAATTCGAAACATTCCCGAGCGTTTTAT -3'  |                  |
